# Supplementary material for: Metabolomic and physiological analysis of bud differentiation in dense apple (Malus×domestica Borkh.) orchards following thinning and reshaping
Source: PeerJ. 2025 Sep 30;13:e20011. doi: 10.7717/peerj.20011 (PMC12493702; doi:10.7717/peerj.20011)
Supplement: Supplemental Information 1 — This series of supplementary tables systematically analyzes the compositional characteristics of metabolites in the T1 vs CK1 comparison group, revealing the major metabolite categories and their relative abundances through a two-tier classification system (Class II and Class I). The data demonstrate that lipids and lipid-like molecules (23.3%) as well as phenylpropanoids and polyketides (20.6%) constitute the predominant metabolite classes. Further subclassification shows that fatty acyls (39.7%) dominate the lipid category, flavonoids (48.1%) are the most abundant in phenylpropanoids, carboxylic acid derivatives (80.9%) prevail among organic acids and derivatives, benzene and substituted derivatives (74.8%) are the primary components of benzenoids, and organoheterocyclic compounds are mainly represented by imidazopyrimidines (10.6%) and indoles (9.8%). These results comprehensively characterize the metabolic profiles of the T1 and CK1 comparison groups, providing critical insights into their metabolic differences. [file peerj-13-20011-s001.xlsx]

## Sheet: Sheet1
Supplementary Table 1a The Class II level statistics of metabolic products in T1 VS CK1 comparison group
Class II	Count	Proportion
Alkaloids and derivatives	3	0.00228833
Benzenoids	139	0.106026
Homogeneous non-metal compounds	3	0.00228833
Hydrocarbons	9	0.00686499
Lignans, neolignans and related compounds	1	<0.1%
Lipids and lipid-like molecules	305	0.232647
Nucleosides, nucleotides, and analogues	11	0.00839054
Organic acids and derivatives	141	0.107551
Organic nitrogen compounds	17	0.0129672
Organic oxygen compounds	73	0.0556827
Organoheterocyclic compounds	123	0.0938215
Organonitrogen compounds	3	0.00228833
Organooxygen compounds	16	0.0122044
Organophosphorus compounds	1	<0.1%
Organosulfur compounds	4	0.00305111
Phenylpropanoids and polyketides	270	0.20595
Sulfadiazine	3	0.00228833
Unknown	189	0.144165
Supplementary Table 1b The Class I level statistics of Lipids and lipid-like molecules metabolic products in T1 VS CK1 comparison group
Class I	Count	Proportion
Fatty Acyls	121	0.396721
Glycerolipids	13	0.042623
Glycerophospholipids	48	0.157377
NA	5	0.0163934
Prenol lipids	93	0.304918
Sphingolipids	4	0.0131148
Sterol Lipids	21	0.0688525
Supplementary Table 1c The Class I level statistics of Phenylpropanoids and polyketide metabolic products in T1 VS CK1 comparison group
Class I	Count	Proportion
Aurone flavonoids	1	0.0037037
Cinnamaldehydes	2	0.00740741
Cinnamic acids and derivatives	54	0.2
Cinnamyl alcohols	1	0.0037037
Coumarins and derivatives	42	0.155556
Diarylheptanoids	1	0.0037037
Flavonoids	130	0.481481
Isocoumarins and derivatives	3	0.0111111
Isoflavonoids	8	0.0296296
Linear 1,3-diarylpropanoids	16	0.0592593
Macrolides and analogues	1	0.0037037
Phenylpropanoic acids	5	0.0185185
Sterigmatocystins	1	0.0037037
Stilbenes	3	0.0111111
Tannins	1	0.0037037
Tetracyclines	1	0.0037037
Supplementary Table 1d The Class I level statistics of Organic acids and derivatives metabolic products in T1 VS CK1 comparison group
Class I	Count	Proportion
-	1	0.0070922
Carboximidic acids and derivatives	2	0.0141844
Carboxylic acids and derivatives	114	0.808511
Hydroxy acids and derivatives	5	0.035461
Keto acids and derivatives	6	0.0425532
NA	6	0.0425532
Organic carbonic acids and derivatives	2	0.0141844
Organic phosphoric acids and derivatives	4	0.0283688
Organic sulfonic acids and derivatives	1	0.0070922
Supplementary Table 1e The Class I level statistics of Benzenoids metabolic products in T1 VS CK1 comparison group
Class I	Count	Proportion
-	4	0.028777
Anthracenes	2	0.0143885
Benzene and substituted derivatives	104	0.748201
Indanes	1	0.00719424
Naphthalenes	8	0.057554
Phenanthrenes and derivatives	2	0.0143885
Phenol ethers	1	0.00719424
Phenols	12	0.0863309
Pyrenes	1	0.00719424
Tetralins	4	0.028777
Supplementary Table 1f The Class I level statistics of Organoheterocyclic compounds metabolic products in T1 VS CK1 comparison group
Class I	Count	Proportion
-	3	0.0243902
Azoles	6	0.0487805
Azolidines	1	0.00813008
Benzimidazoles	6	0.0487805
Benzodiazepines	1	0.00813008
Benzodioxins	2	0.0162602
Benzodioxoles	2	0.0162602
Benzopyrans	2	0.0162602
Benzothiazines	2	0.0162602
Diazanaphthalenes	1	0.00813008
Diazines	10	0.0813008
Dihydrofurans	3	0.0243902
Furans	8	0.0650407
Heteroaromatic compounds	5	0.0406504
Imidazopyrimidines	13	0.105691
Indoles and derivatives	12	0.097561
Isobenzofurans	2	0.0162602
Isocoumarans	2	0.0162602
Lactones	2	0.0162602
Naphthofurans	3	0.0243902
Naphthopyrans	1	0.00813008
Oxanes	1	0.00813008
Oxolanes	1	0.00813008
Piperidines	7	0.0569106
Pteridines and derivatives	10	0.0813008
Pyridines and derivatives	6	0.0487805
Pyrrolines	2	0.0162602
Pyrrolotriazines	1	0.00813008
Quinolines and derivatives	5	0.0406504
Tetrahydroisoquinolines	1	0.00813008
Tetrapyrroles and derivatives	1	0.00813008
Triazines	1	0.00813008
