# Supplementary material for: Metabolomic and physiological analysis of bud differentiation in dense apple (Malus×domestica Borkh.) orchards following thinning and reshaping
Source: PeerJ. 2025 Sep 30;13:e20011. doi: 10.7717/peerj.20011 (PMC12493702; doi:10.7717/peerj.20011)
Supplement: Supplemental Information 3 — Supplementary Tables 3A and 3B present the significantly differential metabolites annotated in KEGG pathways related to secondary metabolite biosynthesis in the T1 vs T2 and T2 vs CK2 comparison groups. The results indicate that multiple pathways involved in secondary metabolism—such as flavonoid biosynthesis, phenylpropanoid metabolism, and alkaloid biosynthesis—were enriched with key differential metabolites. Notably, compounds like catechin, coumarin, ferulic acid, and jasmonic acid showed significant variation among treatments, highlighting the substantial impact of different treatments on the secondary metabolic network in apples. [file peerj-13-20011-s003.xlsx]

## Sheet: Sheet2
Supplementary Table 3a The Statistical table of annotated differential metabolites involved in Biosynthesis of secondary metabolites Pathways in T1 VS T2 comparison group
Kegg_pathway	cpd_ID List	Sig_compound List
Biosynthesis of amino acids	C00135+C02504+C01179	L-Histidine+2-Isopropylmalic acid+4-Hydroxyphenylpyruvic acid
Flavonoid biosynthesis	C05631+C09727	Eriodictyol+(+)-Catechin
Flavone and flavonol biosynthesis	C11620	3',5'-Dimethoxy-3,5,7,4'-tetrahydroxyflavone
Biosynthesis of various plant secondary metabolites	C05851	Coumarin
Phenylpropanoid biosynthesis	C01494	trans-Ferulic acid
Biosynthesis of various alkaloids	C01494	trans-Ferulic acid
Supplementary Table 3b The Statistical table of annotated differential metabolites involved in Biosynthesis of secondary metabolites Pathways in T2 VS CK2 comparison group
Kegg_pathway	cpd_ID List	Sig_compound List
Biosynthesis of amino acids	C00135	Histidine
Flavonoid biosynthesis	C05631+C10107	Eriodictyol+Myricetin
Flavone and flavonol biosynthesis	C10107	Myricetin
Biosynthesis of various plant secondary metabolites	C09315+C02162+C05851	Umbelliferone+Isopimpinellin+Coumarin
Phenylpropanoid biosynthesis	C01197	trans-Caffeic acid
Biosynthesis of various alkaloids	C01197	trans-Caffeic acid
alpha-Linolenic acid metabolism	C08491+C16308	Jasmonic acid+trans-Traumatic acid
Plant hormone signal transduction	C08491	Jasmonic acid
Pentose phosphate pathway	C00345	6-Phosphogluconic acid
Carbon metabolism	C00345	6-Phosphogluconic acid
